# Supplementary material
Source: PubMed Central journal article supplement (PMC2417160)
Supplement: jbc_M708502200_2.pdf [file jbc_M708502200_2.pdf]

## Supplementary information

| Cell lines        | # EGFR molecules per cell | # IFN $\alpha$ R molecules per cell |
|-------------------|---------------------------|-------------------------------------|
| HeLa <sup>a</sup> | $\sim 2 \times 10^4$      | 200                                 |
| A431 <sup>a</sup> | $\sim 2 \times 10^6$      | 100                                 |
| Daudi             | 22                        | 2800                                |
| Daudi-EGFR        | 5640                      | 3600                                |

**Supplementary Table 1. EGFR and IFNAR1 quantification by FACS analysis.** Using microbeads with defined number of phycoerythrin fluorophore per bead we were able to measure the number of EGFR and IFNAR1 in the cell lines used. <sup>a</sup> The number of EGFR was extracted from literature.<sup>21</sup>

## Method

**FACS analysis.** Single cell suspensions of HeLa, A431, Daudi and Daudi-EGFR were washed in cold PBS, subsequently re-suspended in 0.5 mL of PBS and fixed with 2% formaldehyde (methanol free) for 10 minutes at 4 °C. Cells were washed twice with cold PBS, re-suspended in 70  $\mu$ L of PBS and labeled as described by the manufacturer (BD Biosciences) with anti-EGFR R-Phycoerythrin-conjugated mouse mAb or anti-human IFN $\alpha$ / $\beta$  R-phycoerythrin mouse mAb. The samples were kept in the dark at 4 °C and measured with the flow cytometer within 1 h after staining. The number of receptors per cell was extracted from the calibration curve based on QuantiBRITE™ PE beads (BD Biosciences). QuantiBRITE™ PE beads is a mixture of beads used for estimating the number of antibodies bound per cell (ABC) in cells labeled with Phycoerythrin (PE) conjugated monoclonal antibodies. Each of the four bead populations has a calibrated mean number of bound PE molecules/bead which allowed us to determine the number of bound mAb-PE molecules/cell. 10,000 cells were processed for 1-color fluorescence measurements in a FACScan flow cytometer (488 nm argon laser; Becton Dickinson) equipped with Hewlett Packard hardware and a pulse processor for doublet discrimination. Data acquisition and analysis were performed with the FlowJo software (Tree Star, Inc).
